# Supplementary material for: Synthetic ligands for PreQ1 riboswitches provide structural and mechanistic insights into targeting RNA tertiary structure
Source: PubMed Central journal article supplement (PMC6445138; doi:10.1038/s41467-019-09493-3), 2019-04-02
Supplement: 41467_2019_9493_MOESM1_ESM.pdf [file 41467_2019_9493_MOESM1_ESM.pdf]

*Synthetic Ligands for PreQ<sub>1</sub> Riboswitches Provide Structural and Mechanistic Insights into Targeting  
RNA Tertiary Structure*

Colleen M. Connelly,<sup>1,5</sup> Tomoyuki Numata,<sup>2,3,5</sup> Robert E. Boer,<sup>1</sup> Michelle H. Moon,<sup>1</sup> Ranu S. Sinniah,<sup>1</sup>  
Joseph J. Barchi,<sup>1</sup> Adrian R. Ferré-D'Amaré,<sup>2</sup> and John S. Schneekloth, Jr.,<sup>1,\*</sup>

**Supplementary Information**

## Supplementary Methods:

### General Chemistry Methods.

Unless otherwise noted, all chemical reagents were obtained from commercial suppliers and used without further purification. Anhydrous  $\text{CH}_3\text{CN}$ , DMF, and THF were obtained from GlassContour Solvent Systems and were dried over alumina under an argon atmosphere. Solvents were removed using a Buchi rotary evaporator under reduced pressure. Flash column chromatography was performed using a Teledyne ISCO CombiFlash Rf automated chromatography system.

$^1\text{H}$  and  $^{13}\text{C}$  NMR spectra were recorded on Varian and Bruker spectrometers (at 500 MHz or at 125 MHz, respectively) and are reported relative to deuterated solvent signals. Data for  $^1\text{H}$  NMR spectra are reported as follows: chemical shift ( $\delta$  ppm), multiplicity (s = singlet, d = doublet, t = triplet, q = quartet, m = multiplet, br = broad, app = apparent), coupling constants (Hz), and integration. Data for  $^{13}\text{C}$  NMR spectra are reported in terms of chemical shift.

High resolution mass spectrometry data were acquired on an Agilent 6520 Accurate-Mass Q-TOF LC/MS System, (Agilent Technologies, Inc.) equipped with a dual electro-spray source, operated in the positive-ion mode. Separation was performed on Zorbax 300SB-C18 Poroshell column (2.1 mm x 150 mm; particle size 5  $\mu\text{m}$ ). The analytes were eluted using a water/acetonitrile gradient with 0.1% formic acid. Data were acquired at high resolution (1,700  $m/z$ ), 4 GHz. To maintain mass accuracy during the run time, an internal mass calibration sample was infused continuously during the LC/MS runs. Data acquisition and analysis were performed using MassHunter Workstation Data Software, LCMS Data Acquisition (version B.06.01) and Qualitative Analysis (version B.07.00).

### Chemistry Experimental Procedures:

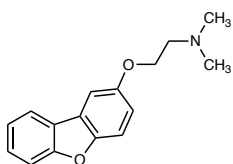

**Dibenzofuran 2:** To a solution 2-(dibenzo[b,d]furan-2-yloxy)ethanamine (20.0 mg, 0.0649 mmol) in DMF/DCE (1:1, 2.0 mL) was added formaldehyde solution (37 wt% in  $\text{H}_2\text{O}$ , 33  $\mu\text{L}$ , 0.440 mmol).  $\text{Na}(\text{OAc})_2\text{BH}$  (93.0 mg, 0.440 mmol) was added and the reaction was stirred at room temperature for 3 h. The reaction mixture was concentrated *in vacuo* and the resulting residue was purified by Isco Column Chromatography (0-25% MeOH in  $\text{CH}_2\text{Cl}_2$ ) to produce 17 mg (76%) of **2** as an off white solid.  $^1\text{H}$  NMR (500 MHz,  $\text{DMSO}-d_6$ )  $\delta$  8.12 (dt,  $J = 7.6, 1.0$  Hz, 1H), 7.74 (d,  $J = 2.6$  Hz, 1H), 7.65 (dt,  $J = 8.3, 0.8$  Hz, 1H), 7.59 (d,  $J = 8.9$  Hz, 1H), 7.50 (ddd,  $J = 8.4, 7.2, 1.4$  Hz, 1H), 7.38 (td,  $J = 7.5, 0.9$  Hz, 1H), 7.09 (dd,  $J = 8.9, 2.7$  Hz, 1H),

4.15 (t,  $J = 5.8$  Hz, 2H), 2.68 (t,  $J = 5.8$  Hz, 2H), 2.25 (s, 6H).  $^{13}\text{C}$  NMR (125 MHz,  $\text{DMSO-}d_6$ )  $\delta$  156.1, 154.8, 150.0, 127.5, 124.2, 123.9, 122.8, 121.2, 115.9, 112.1, 111.7, 105.1, 66.4, 57.6, 45.4 (2C). HRMS: (ESI+)  $m/z$  calculated for  $\text{C}_{10}\text{H}_9\text{NO}_2$  [M+H] $^+$ : 256.1332, found: 256.1324. Spectra are provided in Supplementary Figure 14.

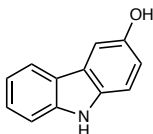

**Carbazole 4:** To a flame-dried flask equipped with stir-bar was added 3-methoxy-9H-carbazole (140 mg, 0.710 mmol) and  $\text{CH}_2\text{Cl}_2$  (25 mL). A solution of  $\text{BBr}_3$  (1.0 M in  $\text{CH}_2\text{Cl}_2$ , 2.13 mL, 2.13 mmol) was added dropwise slowly and the reaction stirred at room temperature for 3 h. The reaction was cooled to 0  $^\circ\text{C}$ , treated with MeOH (1 mL), and stirred for 5 min. The reaction mixture was then diluted with  $\text{H}_2\text{O}$  and the aqueous layer extracted with  $\text{CH}_2\text{Cl}_2$  (3 x 20 mL). The combined organic layers were dried ( $\text{MgSO}_4$ ), filtered, and concentrated *in vacuo*. The resulting residue was purified by Isco flash column chromatography (0-100% EtOAc in hexanes) to afford 117 mg (90%) of carbazole **4** as a light brown solid. The spectral data matched reported values.

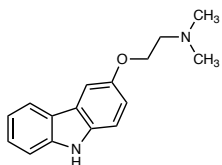

**Carbazole 3:** To a solution of carbazole **4** (10.0 mg, 0.0546 mmol) in  $\text{CH}_3\text{CN}$  (1 mL) was added  $\text{K}_2\text{CO}_3$  (9.0 mg, 0.0655 mmol) and 2-Chloro- $N,N$ -dimethylethylamine hydrochloride (9.4 mg, 0.0655 mmol). The reaction was heated to reflux and stirred for 16 h. After cooling to room temperature, the reaction was concentrated, and the resulting residue dissolved in  $\text{CH}_2\text{Cl}_2$  and  $\text{H}_2\text{O}$ . The aqueous layer was extracted with  $\text{CH}_2\text{Cl}_2$  (3 x 10 mL) and the organics were washed with  $\text{H}_2\text{O}$  (10 mL) and brine (10 mL), dried ( $\text{Na}_2\text{SO}_4$ ), filtered and concentrated *in vacuo*. The resulting residue was purified by Isco flash column chromatography (0-25% MeOH in  $\text{CH}_2\text{Cl}_2$ ) to afford 8 mg (60%) of **3** as a light brown solid.  $^1\text{H}$  NMR (500 MHz,  $\text{DMSO-}d_6$ )  $\delta$  11.03 (s, 1H), 8.08 (d,  $J = 7.7$  Hz, 1H), 7.70 (d,  $J = 2.5$  Hz, 1H), 7.43 (d,  $J = 8.1$  Hz, 1H), 7.37 (d,  $J = 8.7$  Hz, 1H), 7.34 (ddd,  $J = 8.2, 7.0, 1.2$  Hz, 1H), 7.13-7.08 (m, 1H), 7.02 (dd,  $J = 8.7, 2.5$  Hz, 1H), 4.15 (t,  $J = 5.8$  Hz, 2H), 2.75 (t,  $J = 5.8$  Hz, 2H), 2.31 (s, 6H).  $^{13}\text{C}$  NMR (125 MHz,  $\text{DMSO-}d_6$ )  $\delta$  152.0, 140.4, 134.6, 125.4, 122.8, 122.4, 120.3, 118.0, 115.2, 111.5, 110.9, 104.1, 66.2, 57.8, 45.4 (2C). HRMS: (ESI+)  $m/z$  calculated for  $\text{C}_{16}\text{H}_{19}\text{N}_2\text{O}$  [M+H] $^+$ : 255.1492, found: 255.1483. Spectra are provided in Supplementary Figure 15.

**Supplementary Table 1.** Sequences of riboswitch oligonucleotides.

| Name                          | Sequence (5' – 3')                                                                                                              | Vendor    | Experiment                         |
|-------------------------------|---------------------------------------------------------------------------------------------------------------------------------|-----------|------------------------------------|
| 5'-Cy5- <i>BsPreQ</i> -RS     | Cy5-AGA GGU UCU AGC UAC ACC<br>CUC UAU AAA AAA CUA A                                                                            | Dharmacon | SMM, FIA                           |
| 5'-Cy5-SAM-II-RS              | Cy5-UCG CGC UGA UUU AAC CGU<br>AUU GCA AGC GCG UGA UAA AUG<br>UAG CUA AAA AGG G                                                 | Dharmacon | SMM                                |
| 5'-Cy5-TPP-RS                 | Cy5-CAG UAC UCG GGG UGC CCU<br>UCU GCG UGA AGG CUG AGA AAU<br>ACC CGU AUC ACC UGA UCU GGA<br>UAA UGC CAG CGU AGG GAA GUG<br>CUG | Dharmacon | SMM                                |
| <i>BsPreQ</i> -RS (unlabeled) | AGA GGU UCU AGC UAC ACC CUC<br>UAU AAA AAA CUA A                                                                                | Dharmacon | Ligand Fluorescence Titration, NMR |
| 5'-Biotin- <i>BsPreQ</i> -RS  | Bi-GGA GAG GUU CUA GCU ACA CCC<br>UCU AUA AAA AAC UAA                                                                           | Dharmacon | SPR                                |
| 5'-AF647- <i>BsPreQ</i> -RS   | AlexaFluor647*-GGA GAG GUU CUA<br>GCU ACA CCC UCU AUA AAA AAC<br>UAA                                                            | IDT DNA   | In-line Probing                    |
| 5'-AF647- <i>TtPreQ</i> -RS   | AlexaFluor647*-CUG GGU CGC AGU<br>AAC CCC AGU UAA CAA AAC AAG                                                                   | IDT DNA   | FIA, In-line Probing               |
| <i>TtPreQ</i> -RS (unlabeled) | CUG GGU CGC AGU AAC CCC AGU<br>UAA CAA AAC AAG                                                                                  | Dharmacon | Ligand Fluorescence Titration, NMR |
| 5'-Biotin- <i>TtPreQ</i> -RS  | Bi-CUG GGU CGC AGU AAC CCC AGU<br>UAA CAA AAC AAG                                                                               | Dharmacon | SPR                                |
| <i>SsPreQ</i> -RS (unlabeled) | AGA GGU UCC UAG CUG AUA CCC<br>UCU AUA AAA AAC UA                                                                               | Dharmacon | NMR                                |
| ab13_14                       | CUG GGU CGC AGU <u>NNC</u> CCC AGU<br>UAA CAA AAC AAG                                                                           | Dharmacon | Crystallography                    |
| ab13_14_15                    | CUG GGU CGC AGU <u>NNN</u> CCC AGU<br>UAA CAA AAC AAG                                                                           | Dharmacon | Crystallography                    |

N shows an abasic site of the RNA

\*5'-modification is accomplished with AlexaFluor647-NHS ester

**Supplementary Table 2.** Selected sequences of RNA and DNA oligonucleotides screened by SMM (Figure 1C).

| Oligonucleotide | Name                     | Structure           | Sequence (5' – 3')                                                                  |
|-----------------|--------------------------|---------------------|-------------------------------------------------------------------------------------|
| 1               | Pre-miR-21 <sup>2</sup>  | RNA hairpin         | AlexaFluor647*-UAGCUUAUCAGACUGAUGUU<br>GACUGUUGAAUCUCAUGGCAACACCAGUCGAUGGG<br>CUGUC |
| 2               | Pre-miR-17 <sup>3</sup>  | RNA hairpin         | AlexaFluor647*-<br>CAAAGUGCUUACAGUGCAGGUAGUGAUUGUGCAU<br>CUACUGCAGUGAAGGCACUUGUAG   |
| 3               | Pre-miR-31 <sup>3</sup>  | RNA hairpin         | AlexaFluor647*-<br>AGGCAAGAUGCUGGCAUAGCUGUUGAACUGGGAAC<br>CUGCUAUGCCAACAUAUUGCCAUC  |
| 8               | HIV RRE IIB <sup>4</sup> | RNA hairpin         | AlexaFluor647*-UGGGCGCAGUGUCAUUGACG<br>CUGACGGUACA                                  |
| 14              | Malat1 <sup>5</sup>      | RNA triple<br>helix | AlexaFluor647*-<br>AAAGGUUUUUUCUUUCCUGAGAAAUUUCUCAGGUU<br>UUGCUIUUUAAAAAAAAAGCAAAA  |
| 15              | Zika Ns5 <sup>6</sup>    | RNA G4              | AlexaFluor647*-GUGGAGGUGGGACGGGAGAG<br>ACUCUGGGAGA                                  |
| 16              | Zika 3'UTR <sup>6</sup>  | RNA G4              | AlexaFluor647*-GCGGCGGCCGGUGUGGGGAA                                                 |
| 17              | NRAS <sup>7</sup>        | RNA G4              | AlexaFluor647*-UGUGGGAGGGCGGGUCUGG<br>G                                             |
| 18              | TERRA <sup>8</sup>       | RNA G4              | AlexaFluor647*-GGGUUAGGGU                                                           |
| 19              | EWSR1 <sup>9</sup>       | RNA G4              | AlexaFluor647*-GGGGCAGGGGAAGAGGGGG                                                  |
| 20              | AKTIP <sup>10</sup>      | RNA G4              | AlexaFluor647*-GGGGUGGGGCGGGGCGGG                                                   |
| 22              | MYB <sup>11</sup>        | DNA G4              | AlexaFluor647*-GGAGGAGGAGGTCACGGAGG<br>AGGAGGAGAAGGAGGAGGAGGA                       |
| 23              | MYC <sup>12</sup>        | DNA G4              | AlexaFluor647*-AGGGTGGGGAGGGTGGGG                                                   |
| 24              | KRAS <sup>11</sup>       | DNA G4              | AlexaFluor647*-AGGGCGGTGTGGGAAGAGGG<br>AAGAGGGGGAGGCA                               |
| 26              | VEGF <sup>11</sup>       | DNA G4              | AlexaFluor647*-CGGGGCGGGCCGGGGGCGGG<br>GT                                           |
| 27              | RB1 <sup>11</sup>        | DNA G4              | AlexaFluor647*-CGGGGGTTTTGGGCGG                                                     |
| 28              | BCL2 <sup>13</sup>       | DNA G4              | AlexaFluor647*-AGGGGCGGGCGGGGAGGAA<br>GGGGGCGGGA                                    |
| 29              | cKIT <sup>14</sup>       | DNA G4              | AlexaFluor647*-AGGGAGGGCGCTGGGAGGAG<br>GG                                           |

\*5'-modification is accomplished with AlexaFluor647-NHS ester

**Supplementary Table 3.** Commercial Supplier IDs for 86 candidate compounds from the SMM.\*

| Supplier Product ID |           |           |            |                                         |
|---------------------|-----------|-----------|------------|-----------------------------------------|
| 9188721 (I)         | 5224153   | 2810-4227 | 8019-9983  | NSC79486                                |
| 17311387 (SI1)      | 5269563   | 2810-4329 | 8020-0820  | NSC142269                               |
| 42028139 (SI2)      | 5325779   | 2810-4334 | 8020-2578  | Tobramycin                              |
| 9205277 (SI3)       | 6044923   | 3639-0494 | 8020-2683  | Nedaplatin                              |
| 9190966 (SI4)       | 6357130   | 4269-3090 | 8104-04926 | BMS-536924<br>(IGF-1R Inhibitor)        |
| 5320336 (SI5)       | 6372845   | 4576-0108 | 8388-1007  | KUC107871N-04<br>(p97 ATPase Inhibitor) |
| 5718973 (SI6)       | 6802876   | 4788-0739 | 8388-1008  |                                         |
| 8004-9540 (SI7)     | 9201127   | 5588-0118 | C169-0255  |                                         |
| 8007-1084 (SI8)     | 9202599   | 6233-2517 | C201-0688  |                                         |
| 8018-2852 (SI9)     | 1220123   | 6415-0035 | C430-1098  |                                         |
| 8020-1001 (SI10)    | 17922447  | 8005-0366 | C749-0018  |                                         |
| 8020-1052 (SI11)    | 18682916  | 8007-2266 | C908-0403  |                                         |
| 8104-04684 (SI12)   | 32903475  | 8010-4817 | D245-0159  |                                         |
| C200-4138 (SI13)    | 33921774  | 8014-7935 | D482-2054  |                                         |
| D063-1117 (SI14)    | 56240352  | 8016-5870 | D704-1692  |                                         |
| D494-0506 (SI15)    | 0234-0037 | 8018-2758 | D718-0691  |                                         |
| E595-0532 (SI16)    | 0632-0897 | 8018-2966 | E470-0146  |                                         |
| 8018-4095 (SI17)    | 1001-0003 | 8018-4095 | E511-0764  |                                         |
| 3738-4868 (SI18)    | 1134-0095 | 8018-7423 | E679-0020  |                                         |
| 4013-2178 (SI19)    | 2686-0069 | 8019-6726 | NSC71881   |                                         |

\* For commercial suppliers, IDs with hyphenated numbers are available from ChemDiv ([www.chemdiv.com](http://www.chemdiv.com)), non-hyphenated numbers are from ChemBridge ([www.chembridge.com](http://www.chembridge.com)), NSC numbers are from the NCI Developmental Therapeutics Program (<https://dtp.cancer.gov/repositories/>).

**Supplementary Table 4.** Selectivity of 20 purchased hit compounds across the PreQ<sub>i</sub>, SAM-II and TPP riboswitches screened by SMM as determined by Z-score.

| Supplier Product ID | Compound    | Z-Score |                       |           |        |
|---------------------|-------------|---------|-----------------------|-----------|--------|
|                     |             | Buffer  | PreQ <sub>i</sub> -RS | SAM-II-RS | TPP-RS |
| 9188721             | <b>1</b>    | 0.20    | 7.45                  | 0.01      | -0.44  |
| 17311387            | <b>SI1</b>  | -0.36   | 9.51                  | 2.28      | 9.76   |
| 42028139            | <b>SI2</b>  | -1.21   | 15.53                 | 5.47      | 4.74   |
| 9205277             | <b>SI3</b>  | -0.23   | 5.00                  | 2.21      | 1.00   |
| 9190966             | <b>SI4</b>  | 0.09    | 6.49                  | 3.94      | 2.66   |
| 5320336             | <b>SI5</b>  | 0.26    | 4.13                  | 5.94      | 2.39   |
| 5718973             | <b>SI6</b>  | -0.45   | 3.44                  | 1.08      | -0.52  |
| 8004-9540           | <b>SI7</b>  | -0.39   | 5.48                  | 1.44      | 1.11   |
| 8007-1084           | <b>SI8</b>  | 1.19    | 8.53                  | 2.41      | 2.51   |
| 8018-2852           | <b>SI9</b>  | 0.12    | 8.32                  | 0.76      | 0.72   |
| 8020-1001           | <b>SI10</b> | 0.76    | 8.89                  | 1.48      | 1.99   |
| 8020-1052           | <b>SI11</b> | 0.14    | 5.61                  | 1.97      | 1.31   |
| 8104-04684          | <b>SI12</b> | -0.28   | 3.71                  | 1.03      | 1.27   |
| C200-4138           | <b>SI13</b> | 0.06    | 23.89                 | 9.40      | 10.21  |
| D063-1117           | <b>SI14</b> | -0.11   | 22.28                 | 4.14      | 8.74   |
| D494-0506           | <b>SI15</b> | -0.12   | 8.17                  | 2.09      | 1.54   |
| E595-0532           | <b>SI16</b> | -0.11   | 14.47                 | 6.13      | 6.4    |
| 8018-4095           | <b>SI17</b> | 0.04    | 5.52                  | 0.68      | 1.59   |
| 3738-4868           | <b>SI18</b> | 0.69    | 3.25                  | 7.09      | 1.93   |
| 4013-2178           | <b>SI19</b> | 0.60    | 19.98                 | 19.71     | 11.84  |

**Supplementary Table 5.** Template DNA plasmids for transcription termination assays.

| Name                               | Species                             | Sequence (5' – 3')                                                                                                                                                                                                                                     | Cloned vector     | RNA sequence (5' – 3')                                                                                                                                                                             |
|------------------------------------|-------------------------------------|--------------------------------------------------------------------------------------------------------------------------------------------------------------------------------------------------------------------------------------------------------|-------------------|----------------------------------------------------------------------------------------------------------------------------------------------------------------------------------------------------|
| <i>Ss</i> PreQ <sub>1</sub><br>TTA | <i>Staphylococcus saprophyticus</i> | TTGACTATTTTACC<br>TCTGGCGGTGATAA<br>TGGTTGCATGTAGT<br>AAGGAGGTTGTATG<br>GAAGACGAGAGGTT<br>CCTAGCTGATACCC<br>TCTATAAAAACTA<br>GACACATGTACAAC<br>GTCTGTCTTTTTTA<br>TAGAGATAGGCGTT<br>TTTTTATGCGCTTA<br>TCTAAACCCTGTAC<br>CAGTTAGTTCGACT<br>ATTTTTAAGGAGT | pIDTSMART-<br>AMP | AUGUAGUAAGGAGGUUG<br>UAUGGAAGACGAGAGGU<br>UCCUAGCUGAUACCCUC<br>UAUAAAAAACUAGACAC<br>AUGUACAACGUCUGUCU<br>UUUUUAUAGAGAUAGGC<br>GUUUUUUAUGCGCUUA<br>UCUAAACCUGUACCAG<br>UUAGUUCGACUAUUUUU<br>AAGGAGU |
| <i>Bs</i> PreQ <sub>1</sub><br>TTA | <i>Bacillus subtilis</i>            | TTGACTATTTTACC<br>TCTGGCGGTGATAA<br>TGGTTGCATGTAGT<br>AAGGAGGTTGTATG<br>GAAGACGAGAGGTT<br>CTAGCTACACCCTC<br>TATAAAAACTAAG<br>GACGAGCTGTATCC<br>TTGGATACGGCCTT<br>TTTTATGTTTTTCT<br>AGAGCACCTTCCGA<br>AAAAAGGTGTTTTT<br>TTGCGTGAATTAGC<br>TGTAGC        | pIDTSMART-<br>AMP | AUGUAGUAAGGAGGUUG<br>UAUGGAAGACGAGAGGU<br>UCUAGCUACACCCUCUA<br>UAAAAAACUAAGGACGA<br>GCUGUAUCCUUGGAUAC<br>GGCCUUUUUAUGUUUU<br>UCUAGAGCACCUUCCGA<br>AAAAAGGUGUUUUUUG<br>CGUGAAUUAGCUGUAGC            |



**Supplementary Table 6.** Primers for transcription termination assays.

| Primer name                                | Sequence (5' – 3')                            | Uses                                                                                                                                                      |
|--------------------------------------------|-----------------------------------------------|-----------------------------------------------------------------------------------------------------------------------------------------------------------|
| Transcription forward primer               | CAGTGAGTTGATTGCAGTCCAGTTACG<br>CTG            | PCR amplification from the <i>Ss</i> PreQ <sub>1</sub> TTA, <i>Bs</i> PreQ <sub>1</sub> TTA and <i>Bs</i> Apt <i>Bp</i> Ex PreQ <sub>1</sub> TTA plasmids |
| Transcription reverse primer for <i>Ss</i> | ACTCCTTAAAAATAGTCGAACTAACTG<br>GTACAGGG       | PCR amplification from the <i>Ss</i> PreQ <sub>1</sub> TTA                                                                                                |
| Transcription reverse primer for <i>Bs</i> | GCTACAGCTAATTCACGCAAAAAACA<br>CCTTTTTTTCGG    | PCR amplification from the <i>Bs</i> PreQ <sub>1</sub> TTA                                                                                                |
| Transcription reverse primer for <i>Bp</i> | TTTCTCAAAAAGAAAAGACACCTTTACA<br>TGTGTATGAGGTG | PCR amplification from the <i>Bs</i> Apt <i>Bp</i> Ex PreQ <sub>1</sub> TTA                                                                               |
| 26-nt C-less complementary sequence        | TCTTCCATACAACCTCCTTACTACAT                    | Transcription termination assay to prevent undesired non-specific interactions between the 26-nt C-less sequence and riboswitch                           |

**Supplementary Table 7.** Summary of data collection and refinement statistics.

|                                                                               | ab13_14-1                  | ab13_14_15-1               | ab13_14-2                  | ab13_14_15-3               | ab13_14-PreQi              |
|-------------------------------------------------------------------------------|----------------------------|----------------------------|----------------------------|----------------------------|----------------------------|
| <b>Data collection</b>                                                        |                            |                            |                            |                            |                            |
| Space group                                                                   | <i>P</i> 6 <sub>3</sub> 22 | <i>P</i> 6 <sub>3</sub> 22 | <i>P</i> 6 <sub>3</sub> 22 | <i>P</i> 6 <sub>3</sub> 22 | <i>P</i> 6 <sub>1</sub> 22 |
| Cell dimensions                                                               |                            |                            |                            |                            |                            |
| <i>a</i> , <i>b</i> , <i>c</i> (Å)                                            | 115.4, 115.4,<br>58.8      | 115.1, 115.1,<br>58.8      | 115.4, 115.4,<br>58.5      | 115.4, 115.4,<br>58.5      | 52.3, 52.3, 179.2          |
| Wavelength (Å)                                                                | 1.0                        | 1.0                        | 1.0                        | 0.97741                    | 1.0                        |
| Resolution (Å)                                                                | 57.7-1.80 (1.85-<br>1.80)  | 58.8-1.80 (1.85-<br>1.80)  | 99.9-1.94 (1.99-<br>1.94)  | 41.1-2.56 (2.67-<br>2.56)  | 44.8-1.69 (1.72-<br>1.69)  |
| <i>R</i> <sub>merge</sub>                                                     | 0.080 (4.20)               | 0.081 (2.91)               | 0.094 (4.25)               | 0.090 (1.83)               | 0.036 (1.38)               |
| $\langle I \rangle / \langle \sigma I \rangle$                                | 15.7 (1.0)                 | 16.9 (1.5)                 | 15.0 (1.2)                 | 29.1 (2.4)                 | 44.4 (2.3)                 |
| Completeness (%)                                                              | 100 (99.9)                 | 99.8 (99.2)                | 100 (100)                  | 100 (100)                  | 99.6 (96.2)                |
| Redundancy                                                                    | 25.4 (24.0)                | 25.4 (24.2)                | 25.6 (26.8)                | 37.7 (38.2)                | 33.2 (19.0)                |
| <b>Refinement</b>                                                             |                            |                            |                            |                            |                            |
| Resolution (Å)                                                                | 57.7-1.80                  | 57.6-1.80                  | 57.7-1.94                  | 41.1-2.56                  | 43.9-1.69                  |
| No. reflections                                                               | 21,838                     | 21,663                     | 17,448                     | 7,764                      | 17,086                     |
| <i>R</i> <sub>work</sub> <sup>a</sup> / <i>R</i> <sub>free</sub> <sup>b</sup> | 0.197/0.205                | 0.195/0.205                | 0.190/0.203                | 0.239/0.248                | 0.181/0.210                |
| No. atoms                                                                     |                            |                            |                            |                            |                            |
| RNA                                                                           | 674                        | 674                        | 674                        | 674                        | 675                        |
| Ligand                                                                        | 17                         | 17                         | 19                         | 19                         | 13                         |
| Ions                                                                          | 0                          | 16                         | 1                          | 0                          | 9                          |
| Water                                                                         | 66                         | 83                         | 50                         | 2                          | 96                         |
| <i>B</i> -factors (Å <sup>2</sup> )                                           |                            |                            |                            |                            |                            |
| RNA                                                                           | 49.8                       | 43.9                       | 59.5                       | 81.2                       | 48.5                       |
| Ligand                                                                        | 33.2                       | 30.4                       | 41.6                       | 48.0                       | 34.2                       |
| Ions                                                                          | -                          | 95.4                       | 73.4                       | -                          | 61.9                       |
| Water                                                                         | 50.3                       | 47.2                       | 56.1                       | 51.2                       | 55.0                       |
| R.m.s. deviations                                                             |                            |                            |                            |                            |                            |
| Bond lengths (Å)                                                              | 0.005                      | 0.005                      | 0.004                      | 0.005                      | 0.005                      |
| Bond angles (°)                                                               | 0.930                      | 0.957                      | 1.059                      | 0.965                      | 0.989                      |
| Estimated coordinate error (Å)                                                | 0.27                       | 0.24                       | 0.22                       | 0.54                       | 0.17                       |
| PDB ID                                                                        | 6E1S                       | 6E1T                       | 6E1U                       | 6E1V                       | 6E1W                       |

The values in parentheses are for the outermost shell.

<sup>a</sup>*R*<sub>work</sub> =  $\Sigma |F_o - F_c| / \Sigma F_o$  for reflections of working set.

<sup>b</sup>*R*<sub>free</sub> =  $\Sigma |F_o - F_c| / \Sigma F_o$  for reflections of test set (5.0% of total reflections).

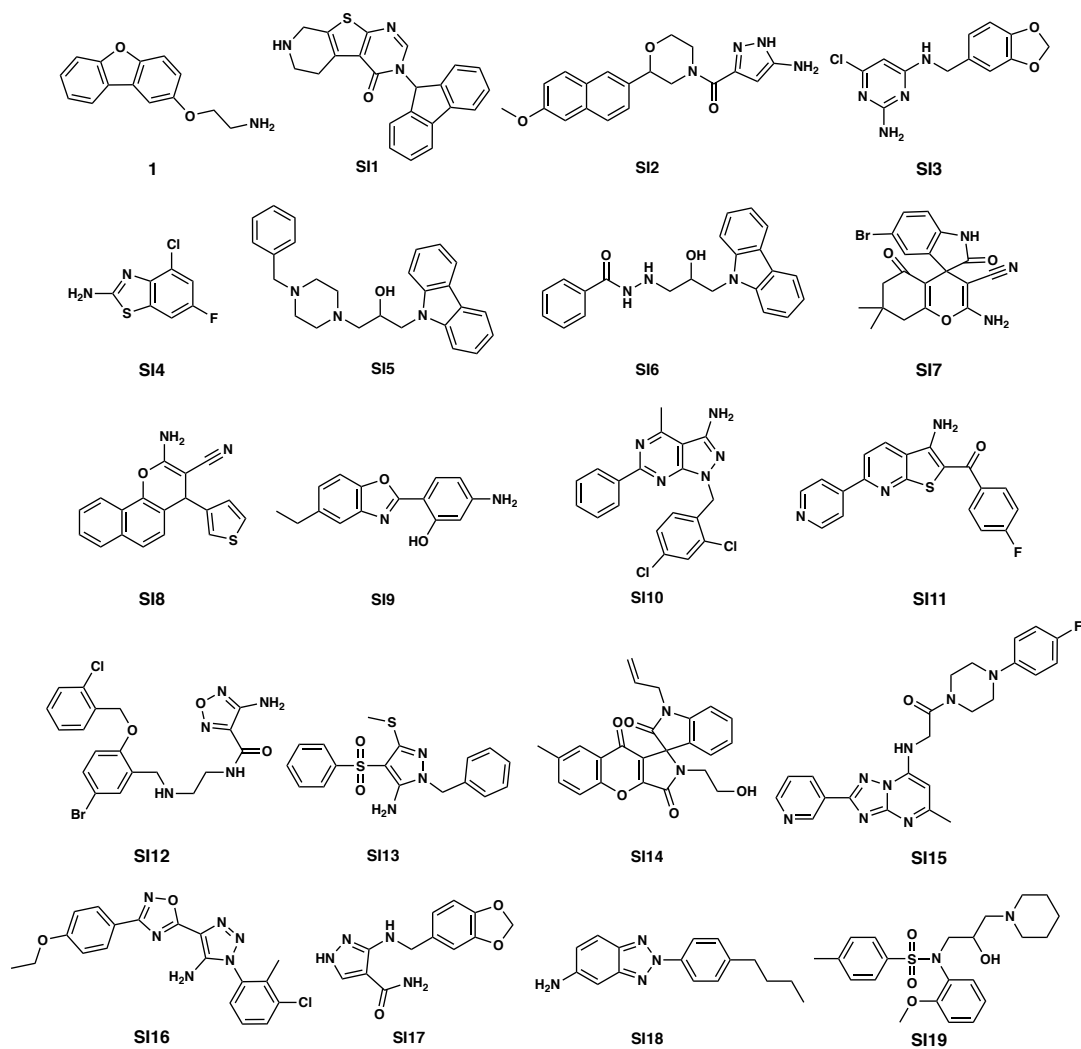

**Supplementary Figure 1.** Hit compounds for the 5'-Cy5-BsPreQ<sub>1</sub>-RS aptamer determined by SMM screening that were purchased for further analysis.

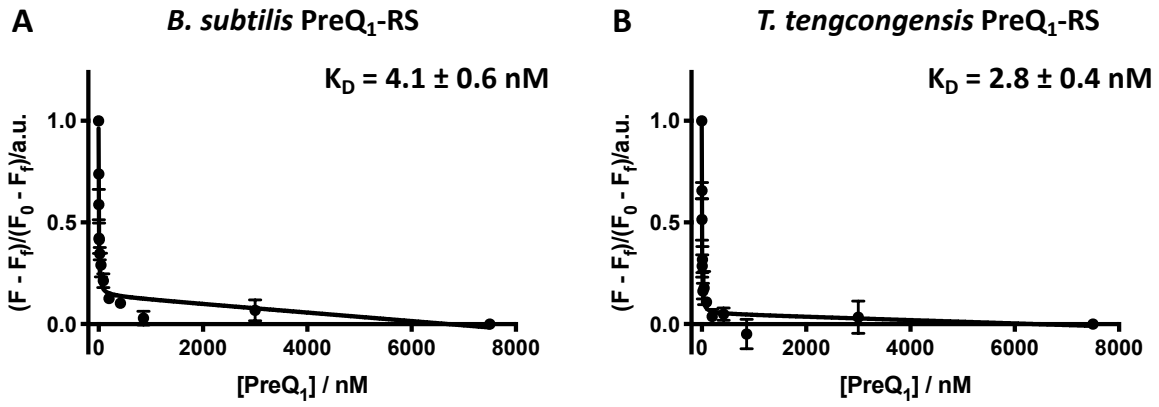

**Supplementary Figure 2.** Fluorescence intensity assay of 5'-Cy5-labeled *Bs*PreQ<sub>1</sub>-RS (A) or 5'-AlexaFluor 647-labeled *Tt*PreQ<sub>1</sub>-RS (B) RNA in the presence of increasing concentration of PreQ<sub>1</sub>. Error bars indicate the standard deviation determined from three independent measurements.

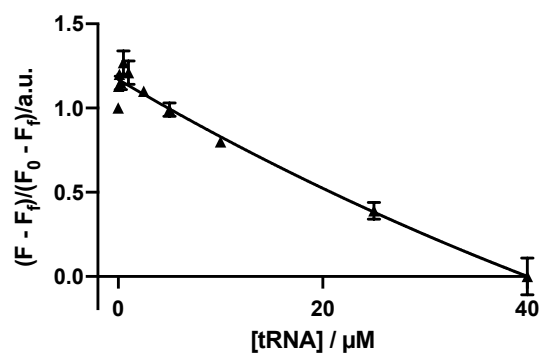

**Supplementary Figure 3.** Inherent fluorescence titration of **1** with increasing concentration of unlabeled yeast tRNA. Error bars indicate the standard deviation determined from three independent measurements.

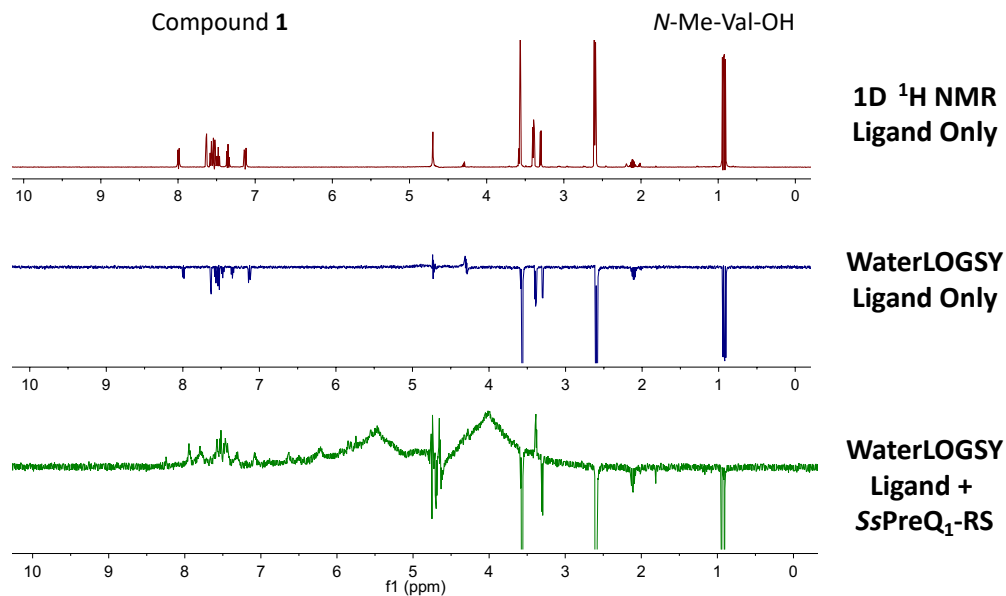

**Supplementary Figure 4.** NMR validation of compound **1** binding to the aptamer domain of the *Ss* PreQ<sub>1</sub> riboswitch.  $^1\text{H}$  NMR of **1** and *N*-methyl-L-valine (non-binding control) (Top, red), WaterLOGSY NMR of **1** and *N*-methyl-L-valine in the absence (middle, blue) and presence (bottom, green) of unlabeled *Ss* PreQ<sub>1</sub> riboswitch aptamer.

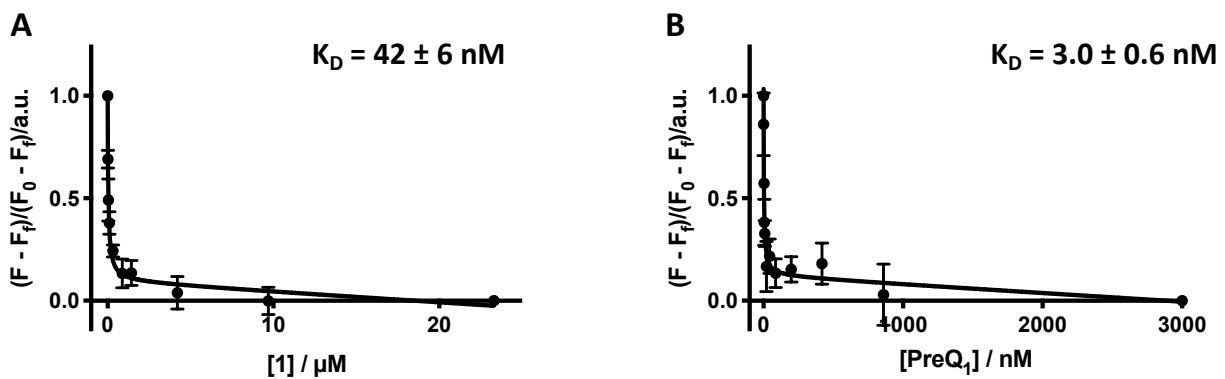

**Supplementary Figure 5.** Fluorescence intensity assay of 5'-AlexaFluor 647-labeled *SsPreQ*-RS RNA in the presence of increasing concentration of **1** (A) or PreQ<sub>1</sub> (B). Error bars indicate the standard deviation determined from three independent measurements.

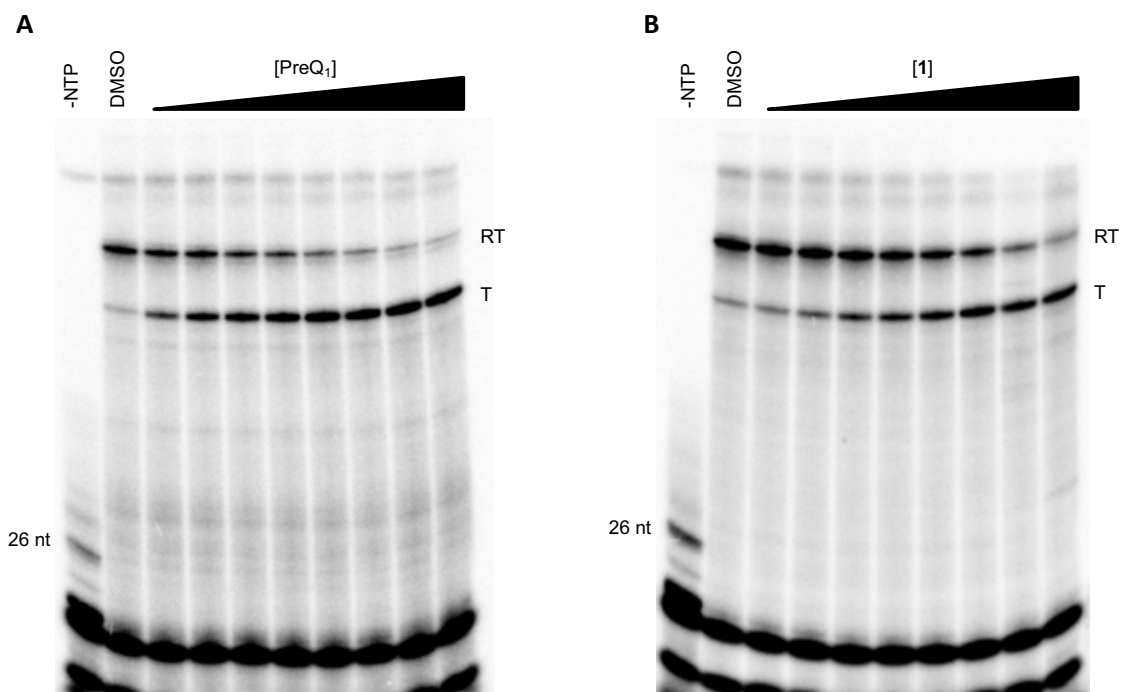

**Supplementary Figure 6.** Representative gel images of transcription termination assays of the *Ss* PreQ<sub>1</sub>-RS template in the presence of increasing concentrations of PreQ<sub>1</sub> (**A**) and **1** (**B**) compared to a DMSO control. Bands corresponding to the read through transcription product (RT) and terminated transcription product (T) are indicated. Experiments were performed in triplicate to confirm reproducibility.



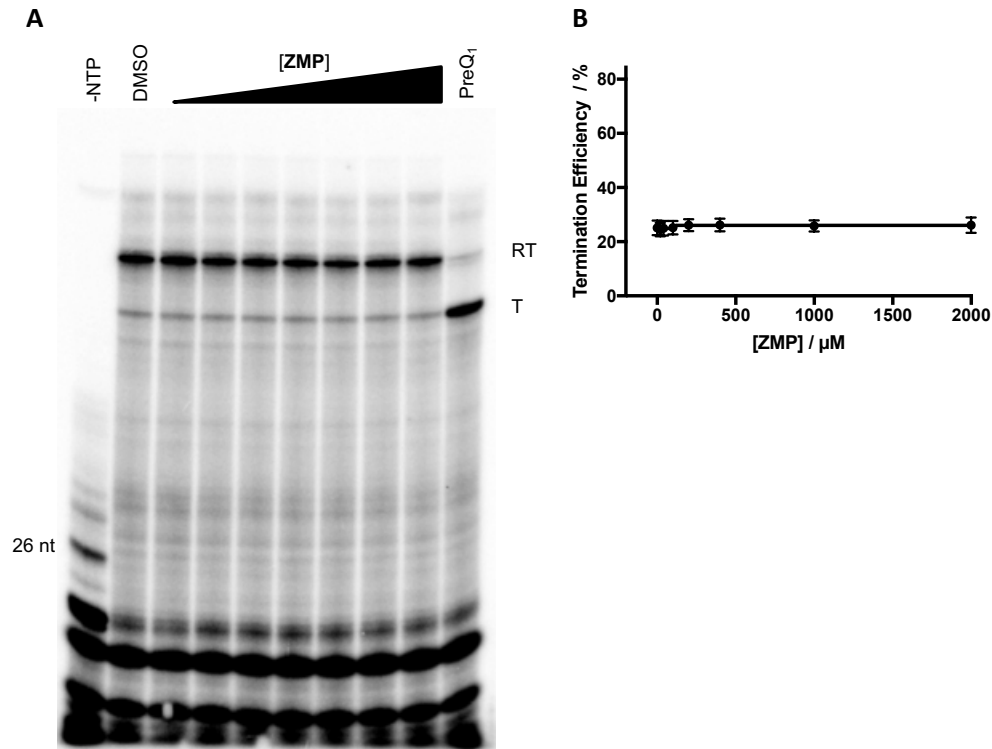

**Supplementary Figure 7.** (A) Representative gel images of transcription termination assays of the *Ss* PreQ<sub>1</sub>-RS template in the presence of increasing concentrations of ZMP compared to DMSO (negative) and PreQ<sub>1</sub> (positive) controls. Bands corresponding to the read through transcription product (RT) and terminated transcription product (T) are indicated. (B) Quantification of transcription termination efficiency of increasing concentrations of ZMP based on the band intensities, where termination efficiency is determined by the background subtracted band intensity of the terminated product compared to the total band intensity of the read through and terminated products. Error bars indicate the standard deviation determined from three independent measurements.

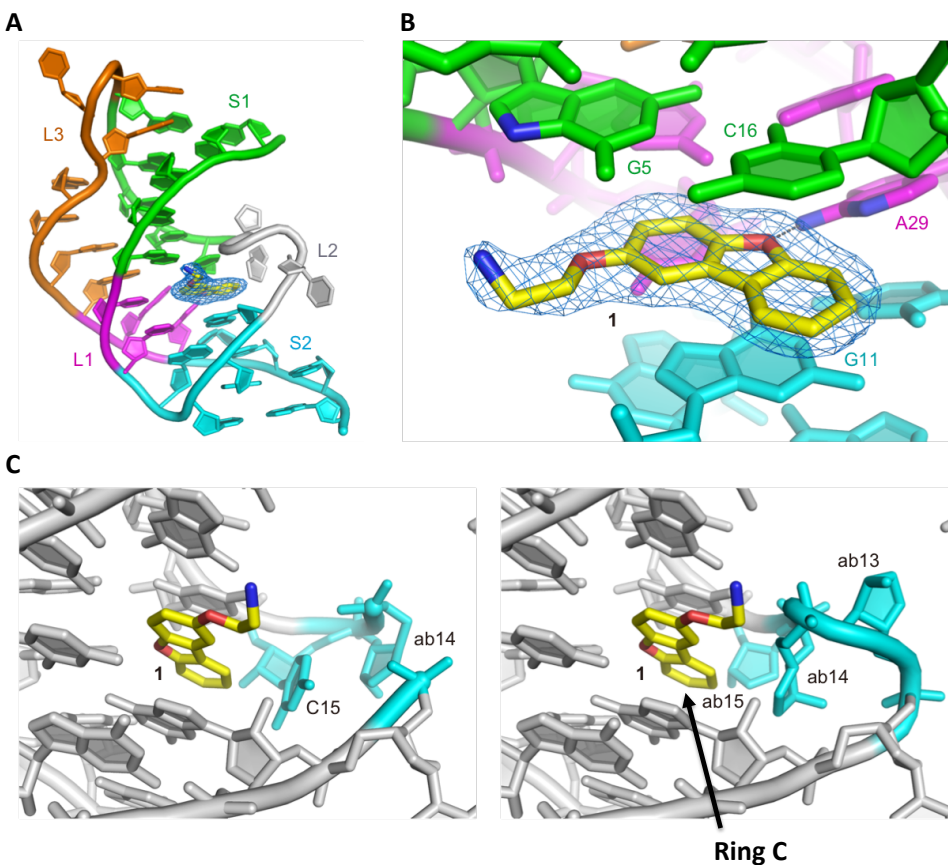

**Supplementary Figure 8.** The co-crystal structure of the ab13\_14\_15 *Tt* PreQ<sub>1</sub> riboswitch aptamer complexed with **1**. (A) Overall structure of the complex. Secondary structure elements are shown in the same color codes as in Figure 6. The unbiased  $|F_o| - |F_c|$  electron density map for **1** is colored blue and contoured at  $3.0 \sigma$ . (B) Close up view of the ligand binding site. The nucleotides that interact with **1** are labeled, and a hydrogen bond is shown as a dotted line. (C) Structural comparison of the L2 in the ab13\_14-**1** and ab13\_14\_15-**1** structures. **1** is colored yellow, and the nucleotides at position 13, 14, and 15 are in cyan.

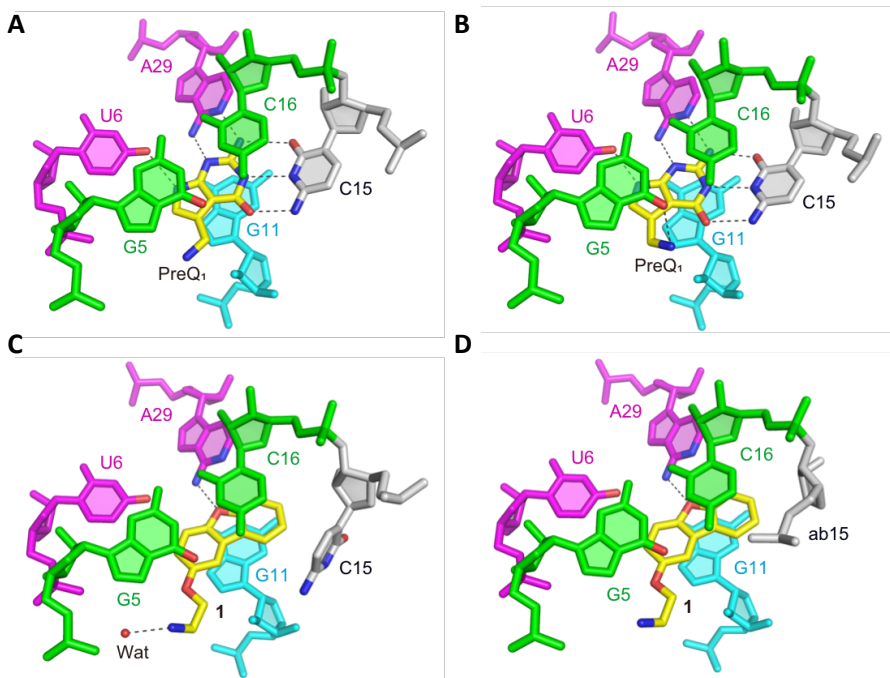

**Supplementary Figure 9.** Compound binding site in the *Tt* PreQ<sub>1</sub> riboswitch aptamer. **(A)** PreQ<sub>1</sub> binding site of the WT-PreQ<sub>1</sub> structure. **(B)** PreQ<sub>1</sub> binding site of the ab13\_14-PreQ<sub>1</sub> structure. **(C)** **1** binding site of the ab13\_14-**1** structure. **(D)** **1** binding site of the ab13\_14\_15-**1** structure. The ligands are colored yellow, and nucleotides contact the ligand are shown in the same color codes in Figure 6. Hydrogen bonds are indicated as dotted lines.

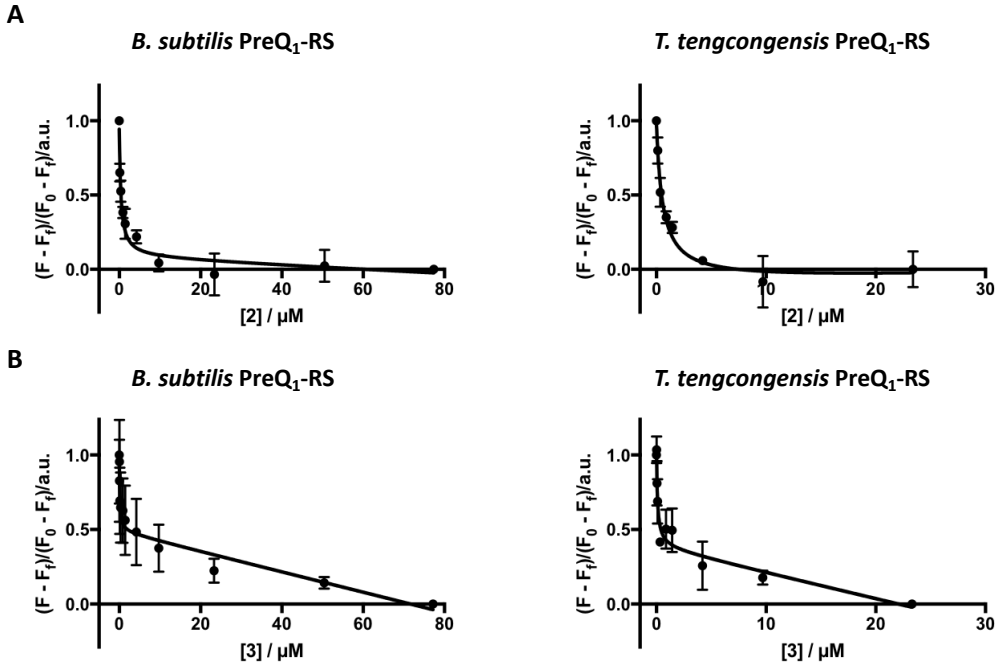

**Supplementary Figure 10.** Fluorescence intensity assays of 5'-Cy5-labeled *Bs*PreQ<sub>1</sub>-RS or 5'-AlexaFluor 647-labeled *Tt*PreQ<sub>1</sub>-RS RNA in the presence of increasing concentration of **2** (**A**) or **3** (**B**) used to determine binding affinities. Error bars indicate the standard deviation determined from three independent measurements.

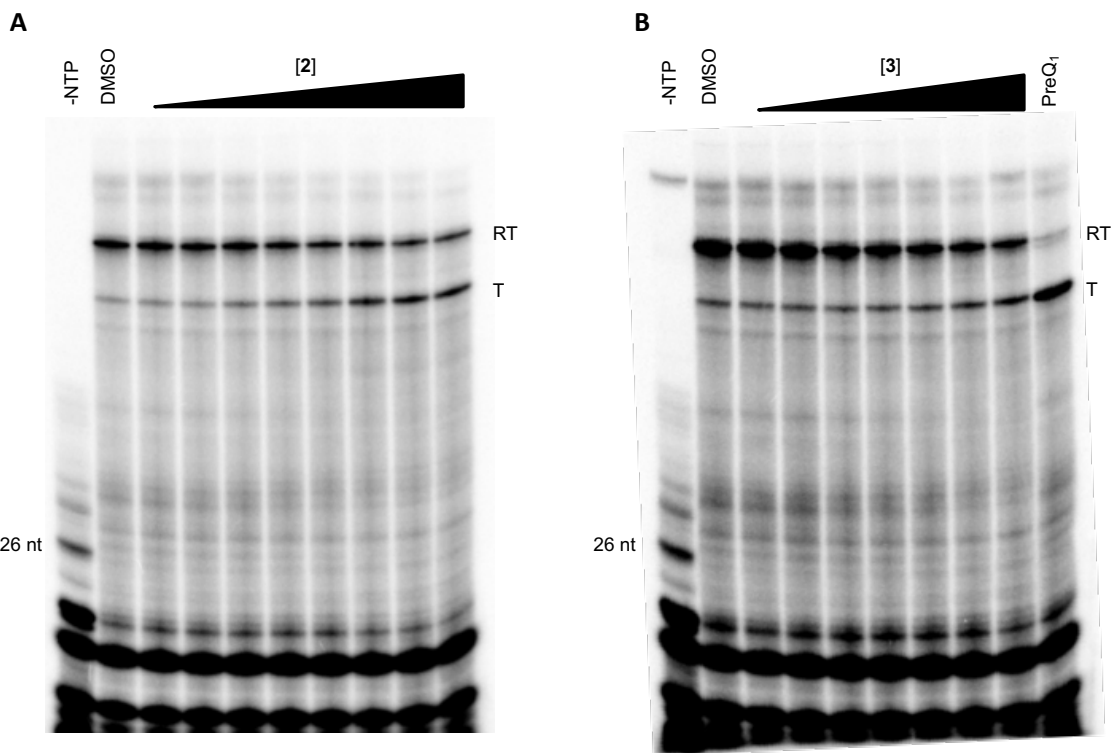

**Supplementary Figure 11.** Representative gel images of transcription termination assays of the *Ss* PreQ<sub>1</sub>-RS template in the presence of increasing concentrations of **2** (A) and **3** (B) compared to a DMSO control. Bands corresponding to the read through transcription product (RT) and terminated transcription product (T) are indicated. Experiments were performed in triplicate to confirm reproducibility.

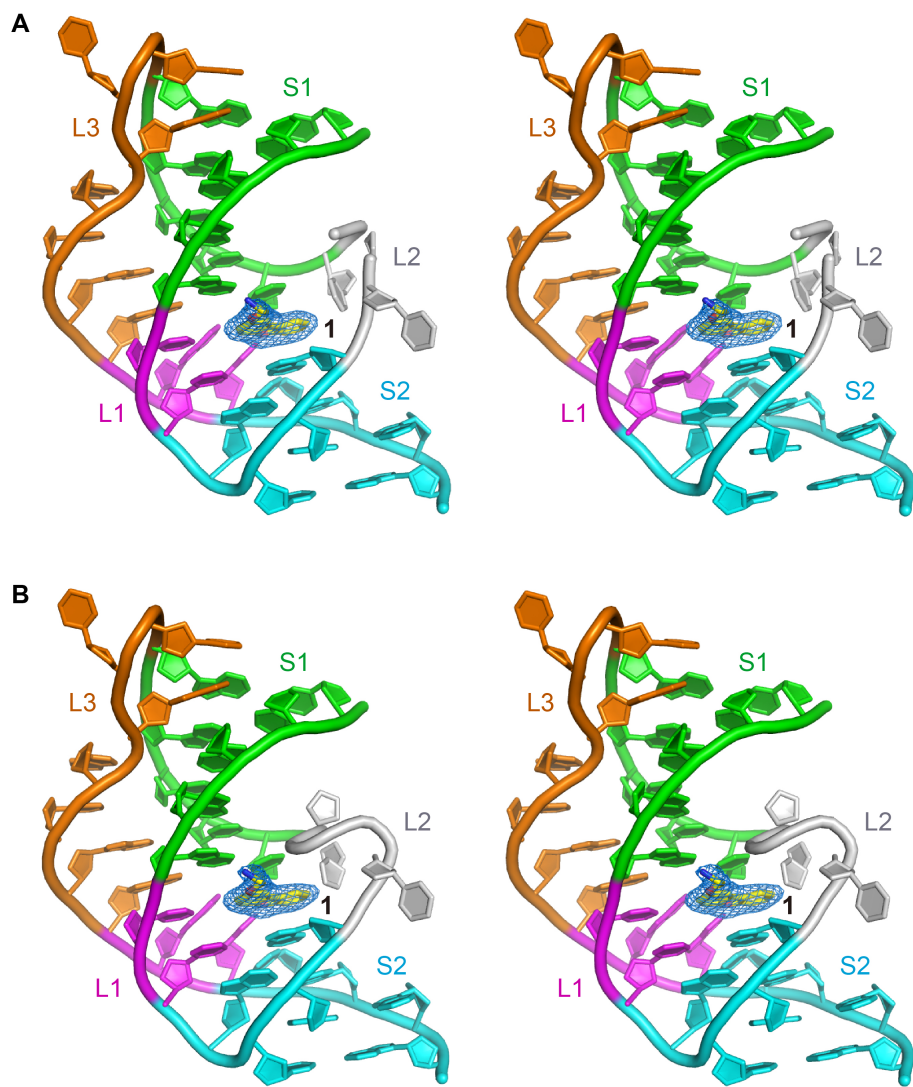

**Supplementary Figure 12.** Stereo images of the overall structure of ab13\_14 (**A**) and ab13\_14\_15 (**B**) *Tt* PreQ<sub>1</sub> riboswitch aptamer complexed with **1**. S1, S2, L1, L2, and L3 are colored green, cyan, magenta, gray, and orange, respectively. The nucleotides between L3 and S2, which interact with L1, are also in magenta. Unbiased  $|F_o| - |F_c|$  electron density map for the compound **1** (blue mesh) contoured at  $3.0 \sigma$ .

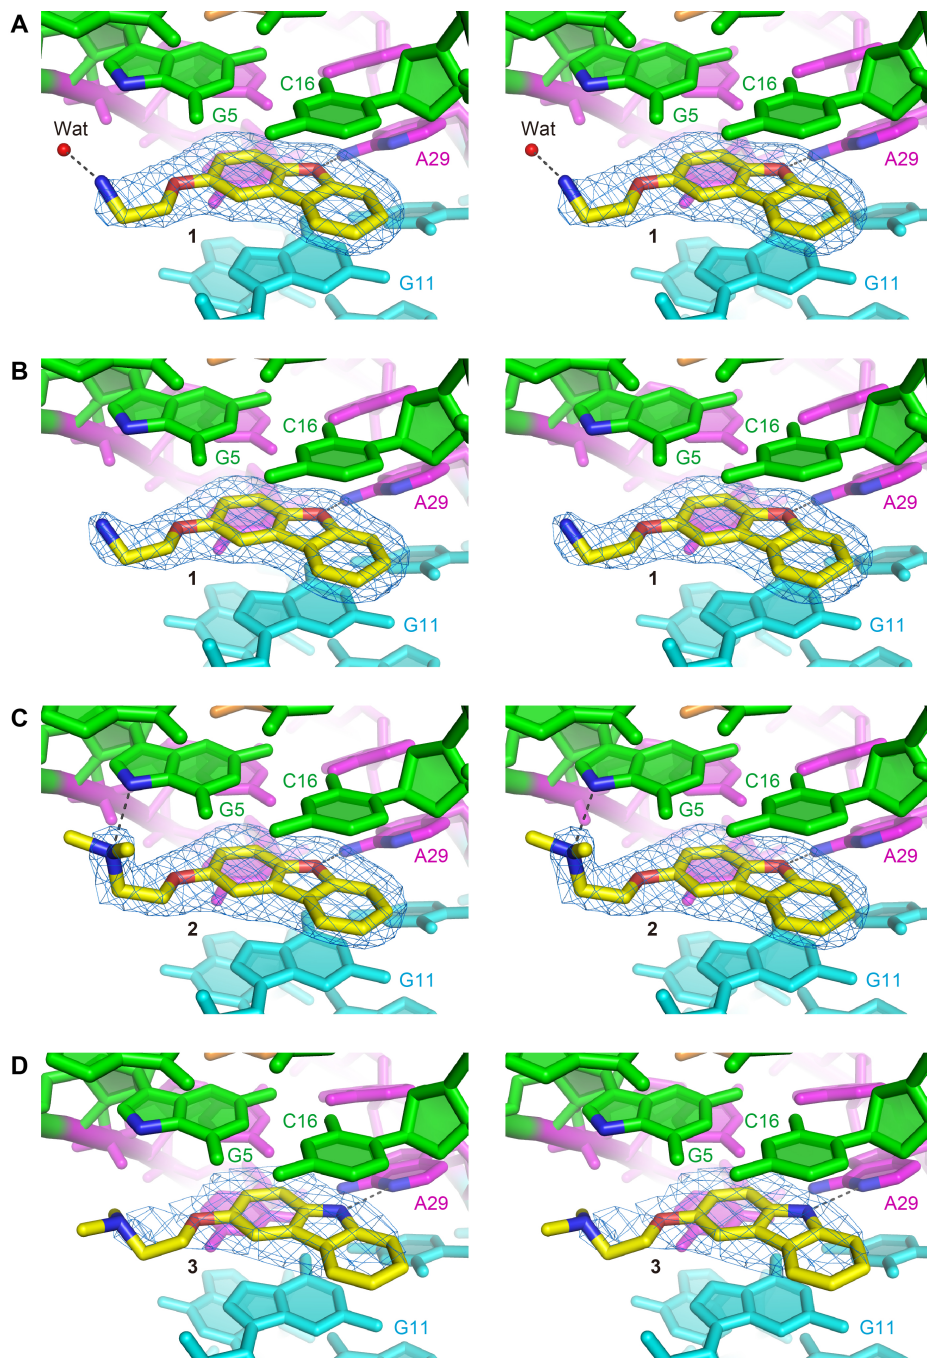

**Supplementary Figure 13.** Stereo images of the compound binding site of the ab13\_14-1 (A), ab13\_14\_15-1 (B), ab13\_14-2 (C), and ab13\_14\_15-3 (D) co-crystal structures. Unbiased  $|F_o| - |F_c|$  electron density map for the compounds (blue mesh) contoured at  $3.0 \sigma$ . Hydrogen bonds are indicated as dotted lines.

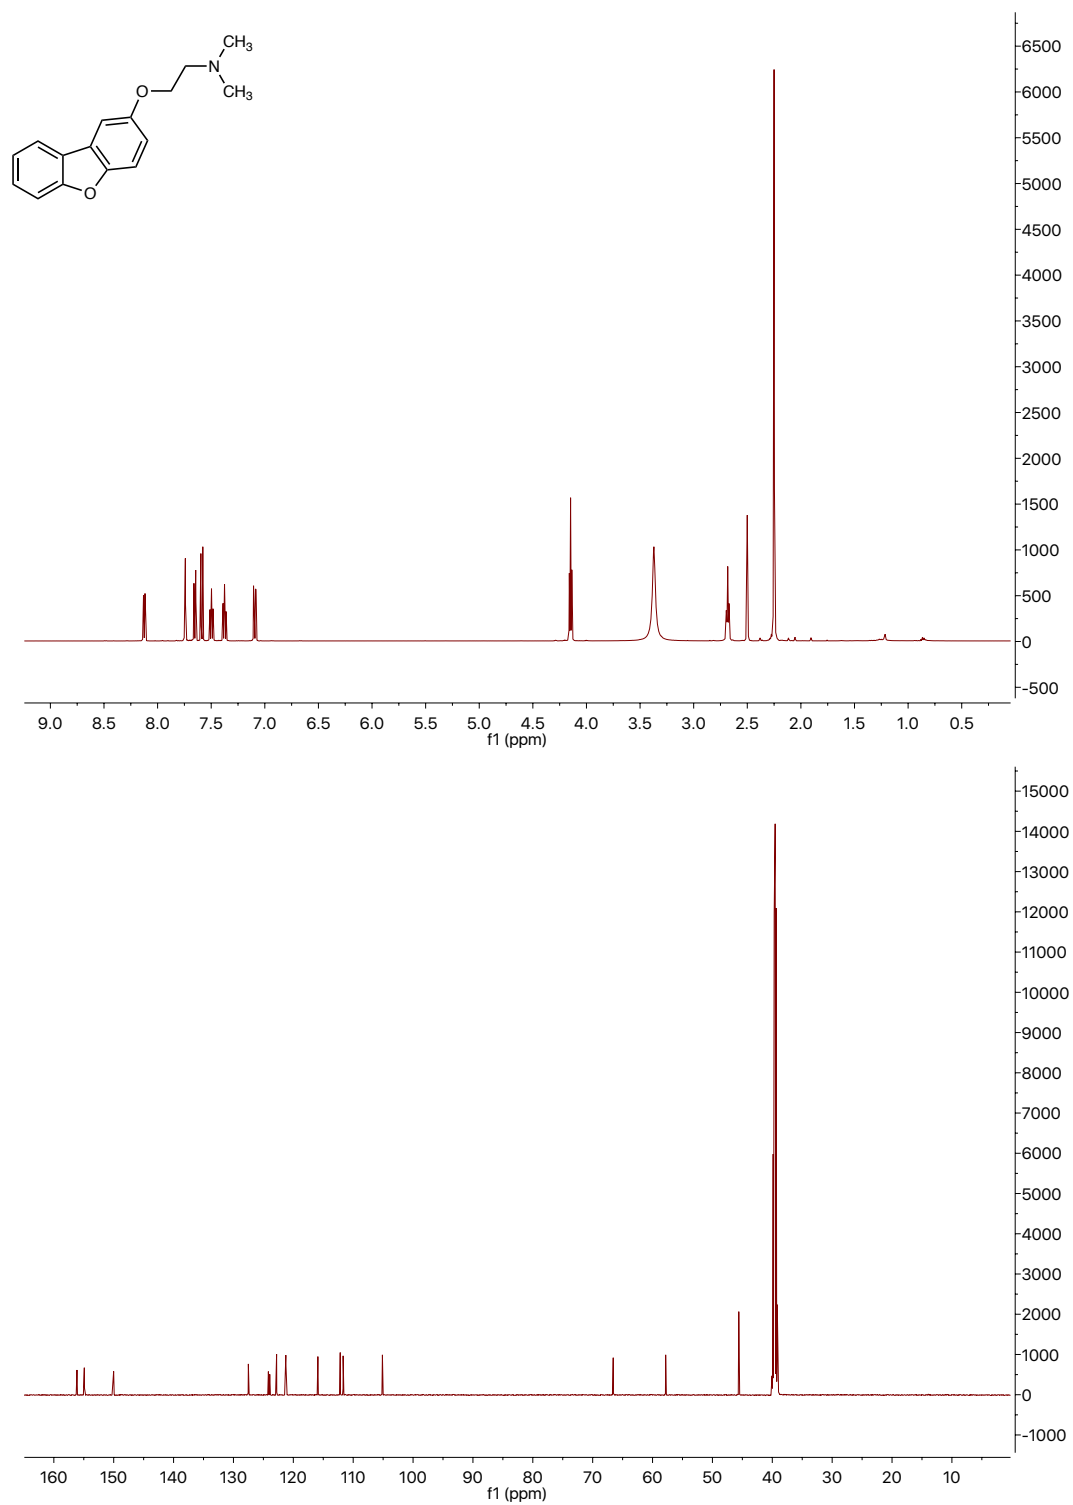

**Supplementary Figure 14.** <sup>1</sup>H NMR (top) and <sup>13</sup>C NMR (bottom) of dibenzofuran **2**.



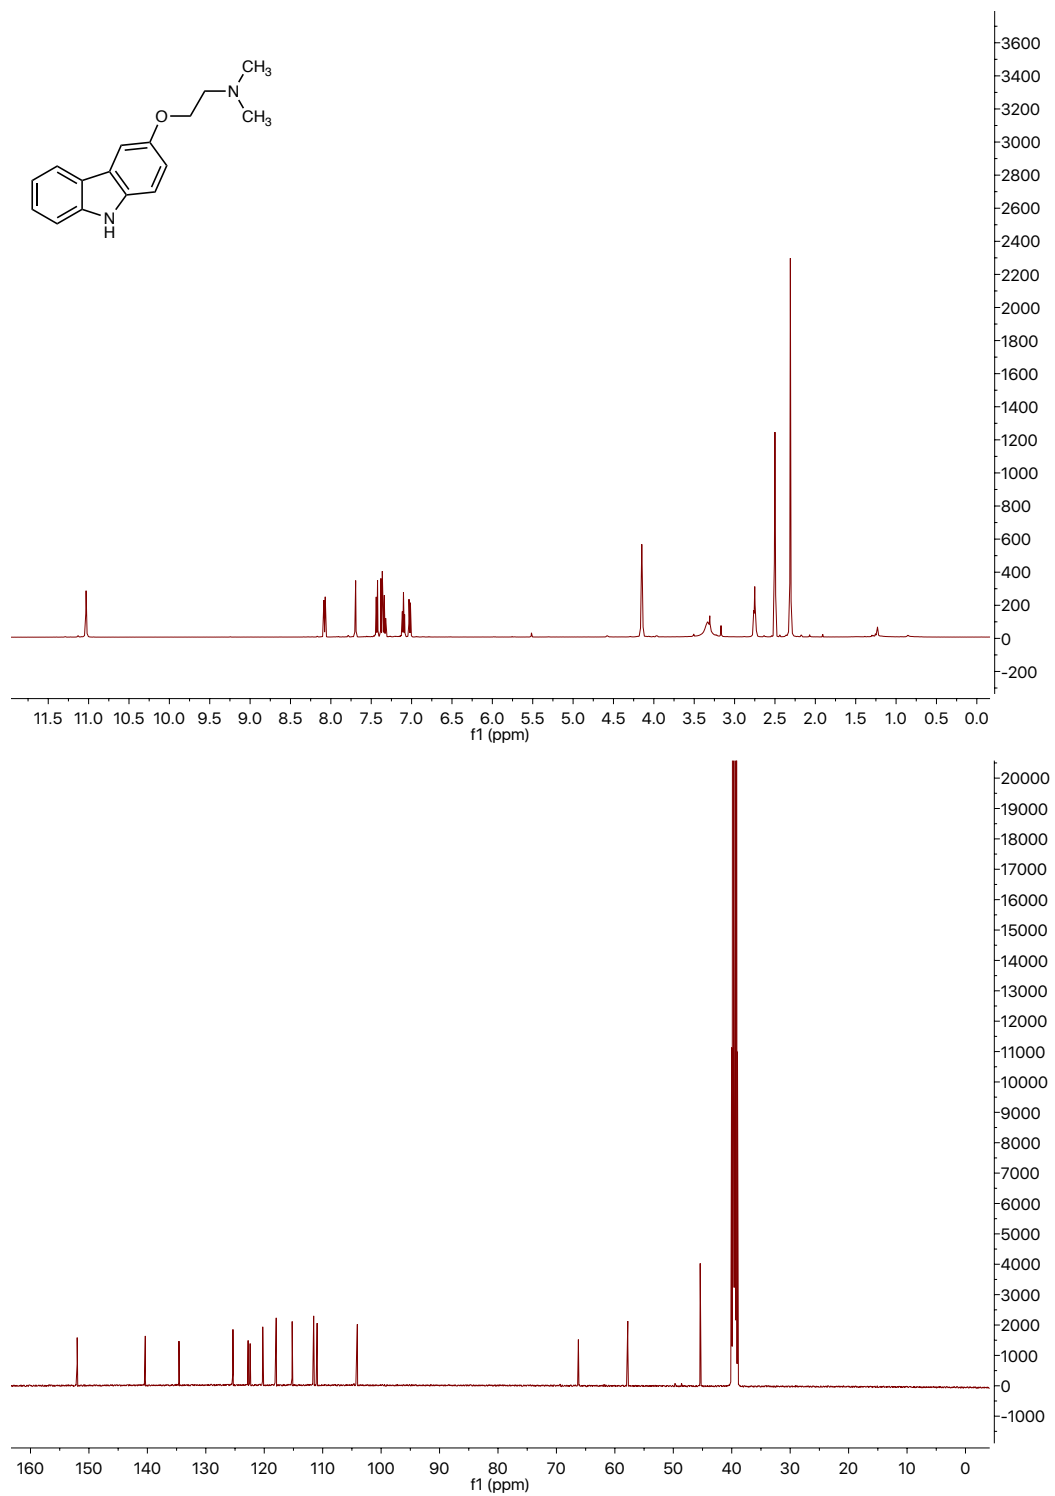

**Supplementary Figure 15.** <sup>1</sup>H NMR (top) and <sup>13</sup>C NMR (bottom) of carbazole **3**.

## Supplementary References

- 1 Ku, S. K. *et al.* Vascular barrier protective effects of 3-N- or 3-O-cinnamoyl carbazole derivatives. *Bioorg Med Chem Lett* **25**, 4304-4307, doi:10.1016/j.bmcl.2015.07.079 (2015).
- 2 Connelly, C. M., Boer, R. E., Moon, M. H., Gareiss, P. & Schneekloth, J. S., Jr. Discovery of Inhibitors of MicroRNA-21 Processing Using Small Molecule Microarrays. *ACS Chem Biol* **12**, 435-443, doi:10.1021/acscchembio.6b00945 (2017).
- 3 Kozomara, A. & Griffiths-Jones, S. miRBase: annotating high confidence microRNAs using deep sequencing data. *Nucleic Acids Res* **42**, D68-73, doi:10.1093/nar/gkt1181 (2014).
- 4 Luedtke, N. W., Liu, Q. & Tor, Y. RNA-ligand interactions: affinity and specificity of aminoglycoside dimers and acridine conjugates to the HIV-1 Rev response element. *Biochemistry-U S* **42**, 11391-11403, doi:10.1021/bi034766y (2003).
- 5 Brown, J. A., Valenstein, M. L., Yario, T. A., Tycowski, K. T. & Steitz, J. A. Formation of triple-helical structures by the 3'-end sequences of MALAT1 and MENbeta noncoding RNAs. *Proc Natl Acad Sci U S A* **109**, 19202-19207, doi:10.1073/pnas.1217338109 (2012).
- 6 Fleming, A. M., Ding, Y., Alenko, A. & Burrows, C. J. Zika Virus Genomic RNA Possesses Conserved G-Quadruplexes Characteristic of the Flaviviridae Family. *Acs Infect Dis* **2**, 674-681 (2016).
- 7 Kumari, S., Bugaut, A., Huppert, J. L. & Balasubramanian, S. An RNA G-quadruplex in the 5' UTR of the NRAS proto-oncogene modulates translation. *Nat Chem Biol* **3**, 218-221, doi:10.1038/nchembio864 (2007).
- 8 Garavis, M. *et al.* Discovery of selective ligands for telomeric RNA G-quadruplexes (TERRA) through 19F-NMR based fragment screening. *ACS Chem Biol* **9**, 1559-1566, doi:10.1021/cb500100z (2014).
- 9 Grohar, P. J. *et al.* Functional Genomic Screening Reveals Splicing of the EWS-FLI1 Fusion Transcript as a Vulnerability in Ewing Sarcoma. *Cell Rep* **14**, 598-610, doi:10.1016/j.celrep.2015.12.063 (2016).
- 10 Agarwala, P., Pandey, S. & Maiti, S. Role of G-quadruplex located at 5' end of mRNAs. *Biochimica et biophysica acta* **1840**, 3503-3510, doi:10.1016/j.bbagen.2014.08.017 (2014).
- 11 Calabrese, D. R. *et al.* Characterization of clinically used oral antiseptics as quadruplex-binding ligands. *Nucleic Acids Res* **46**, 2722-2732, doi:10.1093/nar/gky084 (2018).
- 12 Felsenstein, K. M. *et al.* Small Molecule Microarrays Enable the Identification of a Selective, Quadruplex-Binding Inhibitor of MYC Expression. *ACS Chem Biol* **11**, 139-148, doi:10.1021/acscchembio.5b00577 (2016).
- 13 Felsenstein, K. M. *et al.* Small Molecule Microarrays Enable the Identification of a Selective, Quadruplex-Binding Inhibitor of MYC Expression. *ACS Chem Biol* **11**, 139-148 (2016).
- 14 Rankin, S. *et al.* Putative DNA quadruplex formation within the human c-kit oncogene. *J Am Chem Soc* **127**, 10584-10589, doi:10.1021/ja050823u (2005).
